# Supplementary material for: Maize ZmBES1/BZR1-5 Decreases ABA Sensitivity and Confers Tolerance to Osmotic Stress in Transgenic Arabidopsis
Source: MDPI journal article supplement (doi:10.3390/ijms21030996), 2020-02-03
Supplement: s1 [file s1]

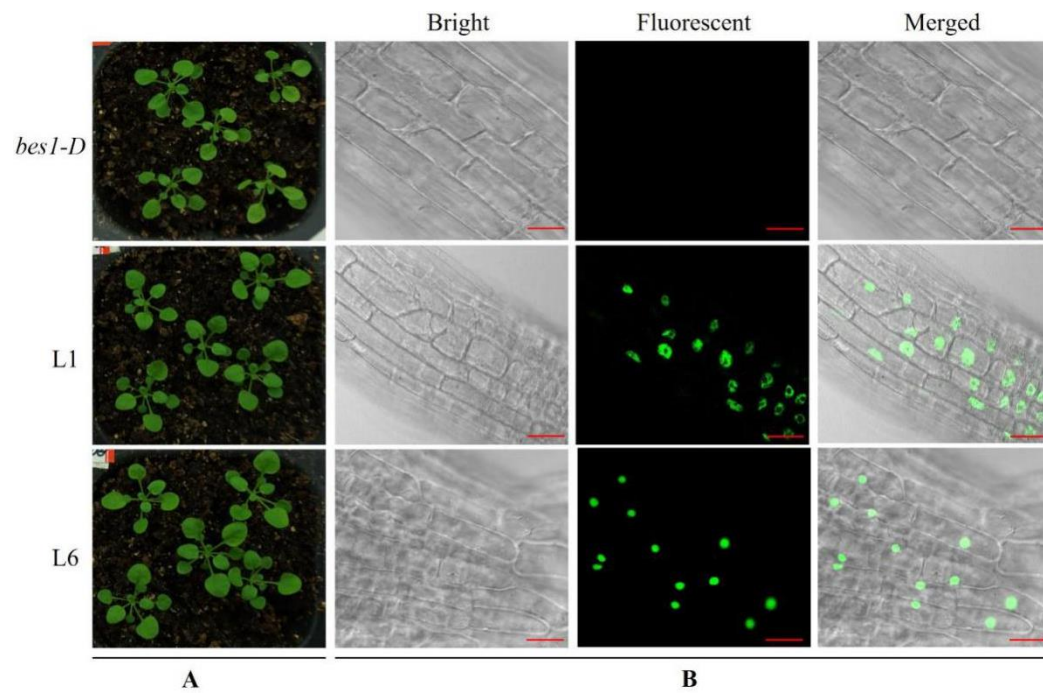

**Figure S1.** Transgenic lines harboring ZmBES1/BZR1-5-GFP were used for further study. (A) The phenotype of every line under standard growth condition. (B) The GFP fluorescence signal test in the seedlings root. *bes1-D*, L1 and L6 represents untransformed mutant and homozygous T<sub>3</sub> lines, respectively.
