# Supplementary material for: Maize ZmBES1/BZR1-5 Decreases ABA Sensitivity and Confers Tolerance to Osmotic Stress in Transgenic Arabidopsis
Source: Int J Mol Sci. 2020 Feb 3;21(3):996. doi: 10.3390/ijms21030996 (PMC7036971; doi:10.3390/ijms21030996)
Supplement: Supplementary file 1 [file ijms-21-00996-s001.zip › ijms-679942 Supplementary Table.xlsx]

## Sheet: Table S1
DEGs that are involved in stress or stimulus response
GO number	GO	NO.of Genes	DEGs	Qvalue	Pvalue	Genes ID
GO:0050896	response to stimulus	42	80	3.3e-09	1.1e-06	// AT1G05510 // AT5G44380 // AT2G02120 // AT1G05260 // AT5G64100 // AT1G73330 // AT3G20210 // AT5G04150 // AT1G52400 // AT2G38390 // AT3G13380 // AT1G17745 // AT4G14690 // AT1G66270 // AT1G21310 // AT1G56650 // AT2G41260 // AT1G52410 // AT1G20620 // AT3G28740 // AT1G19670 // AT2G41240 // AT4G19810 // AT4G22880 // AT5G44120 // AT4G28520 // AT1G12130 // AT3G45140 // AT3G05880 // AT4G26740 // AT5G56…
GO:0042221	response to chemical stimulus	34	80	5.5e-10	2.7e-07	// AT1G05510 // AT5G44380 // AT1G05260 // AT5G64100 // AT1G73330 // AT3G20210 // AT1G52400 // AT2G38390 // AT3G13380 // AT4G14690 // AT1G21310 // AT1G56650 // AT2G41260 // AT1G20620 // AT3G28740 // AT1G19670 // AT2G41240 // AT4G19810 // AT4G22880 // AT5G44120 // AT4G28520 // AT1G12130 // AT3G45140 // AT3G05880 // AT4G26740 // AT5G56550 // AT5G42800 // AT2G31945 // AT5G48000 // AT4G27150 // AT1G08…
GO:0006950	response to stress	30	80	3e-07	5.8e-05	// AT4G14690 // AT5G44380 // AT2G02120 // AT1G05260 // AT5G64100 // AT1G73330 // AT4G26740 // AT5G04150 // AT1G52400 // AT2G38390 // AT1G17745 // AT1G66270 // AT1G56650 // AT1G52410 // AT1G20620 // AT3G28740 // AT1G19670 // AT2G41240 // AT4G19810 // AT4G22880 // AT4G28520 // AT3G45140 // AT3G05880 // AT1G21310 // AT5G56550 // AT5G48000 // AT2G43510 // AT5G61600 // AT5G55240 // AT3G23090
GO:0051716	cellular response to stimulus	19	80	2.4e-05	0.0012	// AT5G48000 // AT1G05260 // AT4G14690 // AT4G28520 // AT1G12130 // AT4G27150 // AT1G56650 // AT2G41260 // AT1G66270 // AT5G44120 // AT3G20210 // AT5G04150 // AT1G52400 // AT1G19670 // AT1G17745 // AT1G20620 // AT4G26740 // AT2G41240 // AT3G23090
GO:0009628	response to abiotic stimulus	19	80	0.00011	0.0034	// AT3G45140 // AT1G05260 // AT4G14690 // AT3G05880 // AT4G28520 // AT5G47990 // AT1G52410 // AT1G56650 // AT1G73330 // AT1G66270 // AT5G61600 // AT4G26740 // AT1G20620 // AT1G52400 // AT2G38390 // AT2G41240 // AT4G19810 // AT5G42800 // AT3G29590
GO:0009719	response to endogenous stimulus	16	80	1e-05	0.00066	// AT4G22880 // AT5G44120 // AT3G45140 // AT1G05510 // AT4G28520 // AT1G12130 // AT4G27150 // AT1G21310 // AT4G26740 // AT2G41260 // AT3G05880 // AT1G56650 // AT1G52400 // AT1G19670 // AT4G19810 // AT3G20210
GO:0009725	response to hormone stimulus	14	80	3e-05	0.0014	// AT3G45140 // AT5G44120 // AT1G05510 // AT4G28520 // AT1G12130 // AT4G27150 // AT4G26740 // AT2G41260 // AT3G05880 // AT1G56650 // AT1G52400 // AT1G21310 // AT4G19810 // AT3G20210
GO:0009607	response to biotic stimulus	12	80	0.0027	0.037	// AT2G43510 // AT1G52410 // AT1G19670 // AT3G28740 // AT1G21310 // AT1G56650 // AT3G45140 // AT5G61600 // AT1G20620 // AT1G52400 // AT3G13380 // AT1G17745
GO:0070887	cellular response to chemical stimulus	11	80	0.0021	0.032	// AT5G44120 // AT4G28520 // AT1G12130 // AT4G27150 // AT4G26740 // AT2G41260 // AT3G20210 // AT1G20620 // AT1G56650 // AT1G19670 // AT1G52400
GO:0033554	cellular response to stress	11	80	0.0028	0.038	// AT1G05260 // AT4G14690 // AT1G66270 // AT1G56650 // AT5G48000 // AT5G04150 // AT1G19670 // AT1G17745 // AT1G20620 // AT2G41240 // AT3G23090
GO:0009605	response to external stimulus	11	80	0.00024	0.0062	// AT4G22880 // AT5G47990 // AT5G04150 // AT1G66270 // AT3G45140 // AT1G05260 // AT1G20620 // AT5G61600 // AT2G41240 // AT5G48000 // AT3G23090
GO:0009737	response to abscisic acid stimulus	9	80	6.9e-05	0.0023	// AT5G44120 // AT1G05510 // AT4G28520 // AT4G26740 // AT3G45140 // AT3G05880 // AT3G20210 // AT1G52400 // AT4G19810
GO:0009266	response to temperature stimulus	9	80	0.0016	0.026	// AT1G05260 // AT4G14690 // AT4G28520 // AT1G66270 // AT1G56650 // AT3G45140 // AT3G05880 // AT4G26740 // AT1G20620
GO:0071495	cellular response to endogenous stimulus	8	80	0.0022	0.032	// AT5G44120 // AT4G28520 // AT1G12130 // AT4G27150 // AT2G41260 // AT3G20210 // AT1G52400 // AT1G19670
GO:0009651	response to salt stress	8	80	0.0018	0.029	// AT1G05260 // AT1G66270 // AT1G56650 // AT3G45140 // AT3G05880 // AT1G52400 // AT2G38390 // AT4G19810
GO:0006970	response to osmotic stress	8	80	0.0027	0.037	// AT1G05260 // AT1G66270 // AT1G56650 // AT3G45140 // AT3G05880 // AT1G52400 // AT2G38390 // AT4G19810
GO:0071496	cellular response to external stimulus	7	80	0.00013	0.0037	// AT1G05260 // AT5G04150 // AT1G66270 // AT5G48000 // AT1G20620 // AT2G41240 // AT3G23090
GO:0032870	cellular response to hormone stimulus	7	80	0.0023	0.033	// AT5G44120 // AT4G28520 // AT1G12130 // AT4G27150 // AT2G41260 // AT3G20210 // AT1G52400
GO:0031668	cellular response to extracellular stimulus	7	80	0.00012	0.0037	// AT1G05260 // AT5G04150 // AT1G66270 // AT5G48000 // AT1G20620 // AT2G41240 // AT3G23090
GO:0009991	response to extracellular stimulus	7	80	0.00016	0.0045	// AT1G05260 // AT5G04150 // AT1G66270 // AT5G48000 // AT1G20620 // AT2G41240 // AT3G23090
GO:0006979	response to oxidative stress	7	80	0.0013	0.024	// AT5G44380 // AT1G05260 // AT1G56650 // AT5G64100 // AT1G20620 // AT2G38390 // AT5G56550

## Sheet: Table S2
The number of E-box or BRRE elements in promoter regions of 30 stress-related DEGs
Gene ID	NO. of E-box	NO. of BRRE
AT4G14690	6	0
AT5G44380	6	0
AT2G02120	6	0
AT1G05260	6	0
AT5G64100	6	0
AT1G73330	4	0
AT4G26740	14	1
AT5G04150	10	1
AT1G52400	4	1
AT2G38390	7	0
AT1G17745	8	0
AT1G66270	2	0
AT1G56650	3	0
AT1G52410	2	0
AT1G20620	10	0
AT3G28740	6	0
AT1G19670	7	0
AT2G41240	8	0
AT4G19810	8	0
AT4G22880	6	0
AT4G28520	12	0
AT3G45140	5	0
AT3G05880	8	0
AT1G21310	2	0
AT5G56550	8	0
AT5G48000	5	0
AT2G43510	7	0
AT5G61600	7	0
AT5G55240	6	1
AT3G23090	8	0
